# Supplementary material for: Self-powered triboelectric nanogenerator with enhanced surface charge density for dynamic multidirectional pressure sensing
Source: Royal Society of Chemistry journal article supplement (doi:10.1039/d4sd00019f), 2024-01-01
Supplement: d4sd00019f1.pdf [file d4sd00019f1.pdf]

## Supporting Information

# Self-Powered Triboelectric Nanogenerator with Enhanced Surface Charge Density for Dynamic Multidirectional Pressure Sensing

*Jiaqi Wu<sup>a,b</sup>, Yu Zhang<sup>c</sup>, and Xin Ting Zheng<sup>a,\*</sup>*

---

<sup>a</sup> *Institute of Materials Research and Engineering (IMRE), Agency for Science, Technology and Research (A\*STAR), 2 Fusionopolis Way, Innovis #08-03, Singapore 138634, Republic of Singapore*

<sup>b</sup> *NUS High School of Mathematics and Science, 20 Clementi Avenue 1, Singapore 129957, Republic of Singapore*

<sup>c</sup> *Department of Electrical and Computer Engineering, National University of Singapore, 4 Engineering Drive 3, Singapore 117583, Republic of Singapore*

## Supporting Figures

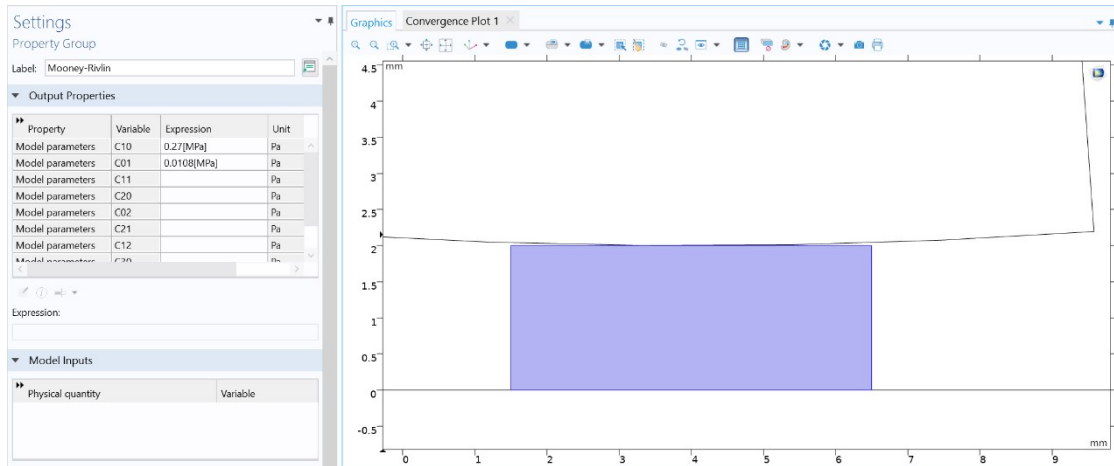

**Figure S1.** COMSOL Multiphysics interface for simulation of von Mises Stress within cuboid sensing structure during triboelectrification.

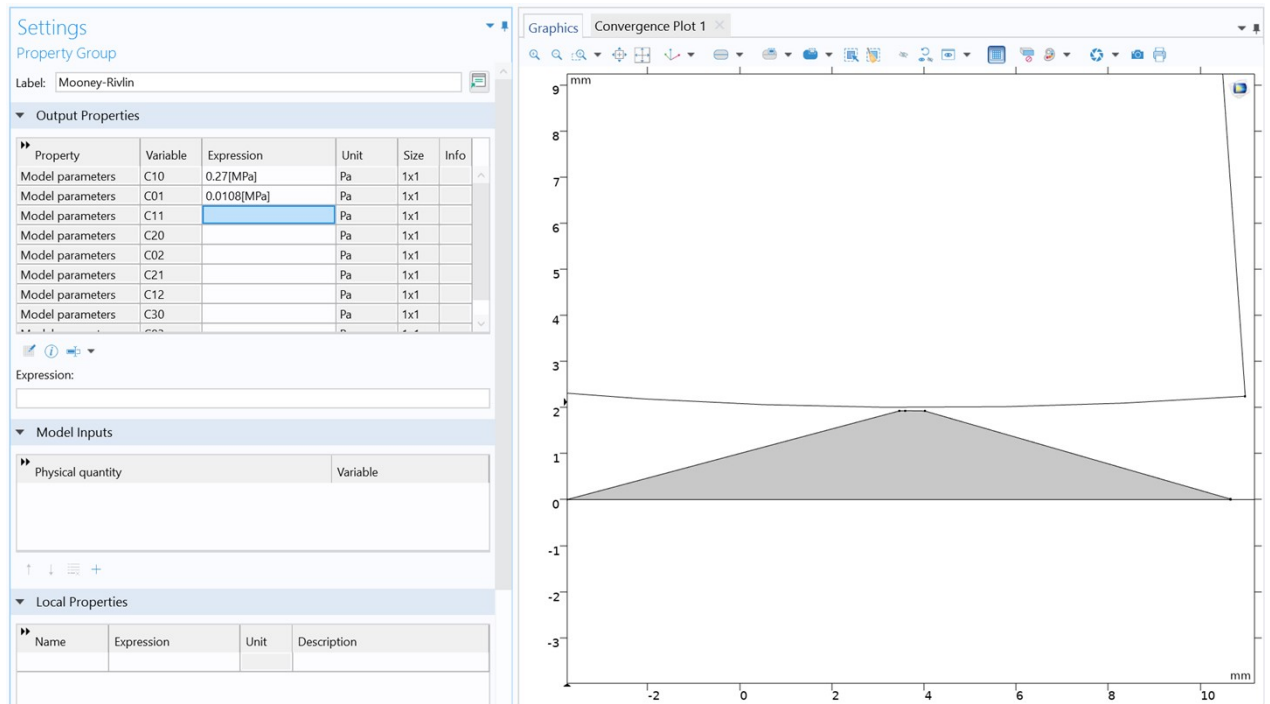

**Figure S2.** COMSOL Multiphysics interface for simulation of von Mises Stress within cone sensing structure during triboelectrification.



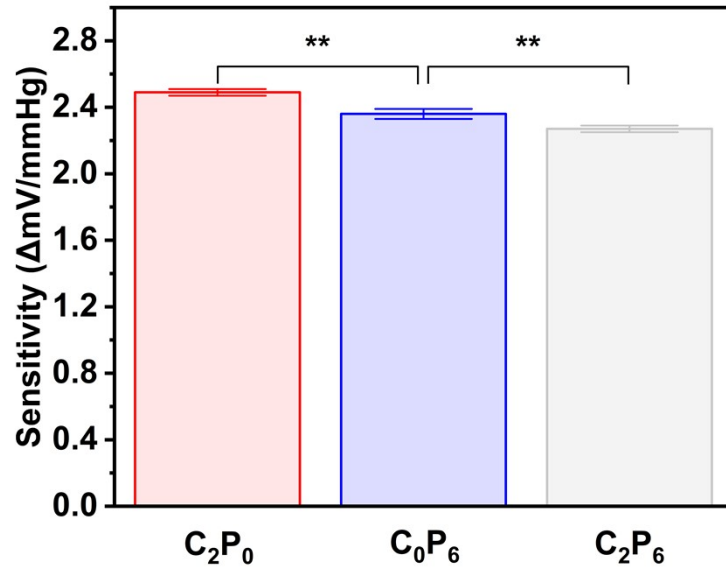

**Figure S3.** Quantitative comparison for sensitivity of C<sub>2</sub>P<sub>0</sub>, C<sub>0</sub>P<sub>6</sub> and C<sub>2</sub>P<sub>6</sub> (n=3). Each data point represents mean ± SD. Two-sample t-test: \*p < 0.05, \*\*p < 0.01, \*\*\*p < 0.001.

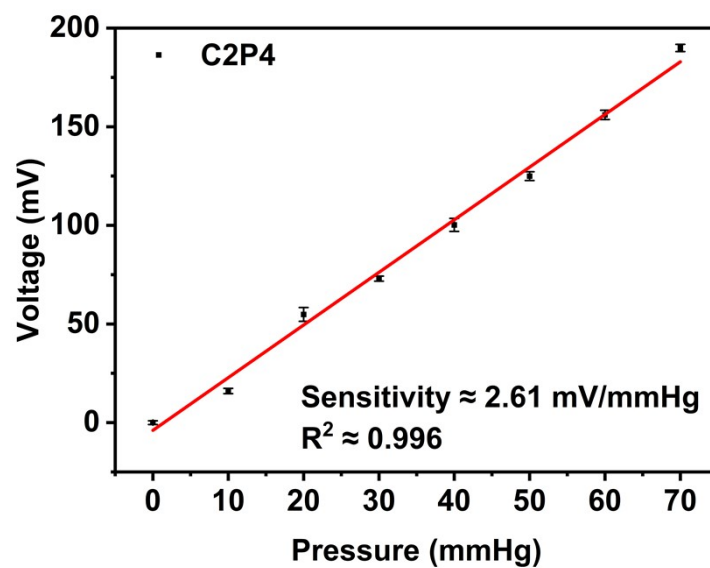

**Figure S4.** Linear regression for  $V_{oc}$  responses of 2 wt% CB and 4 wt% PVP doped STEPs ( $C_2P_4$ ) with cone sensing structure from 0 to 70 mmHg ( $n = 5$ ). Each data point represents  $\bar{x} \pm SD$ .

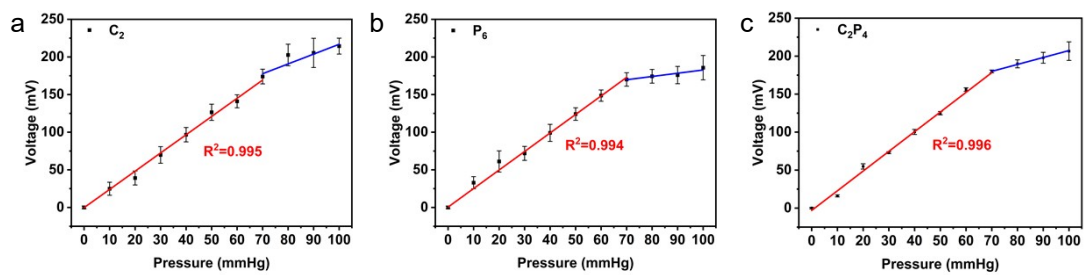

**Figure S5.**  $V_{oc}$  responses from 0 to 100 mmHg for cone structure STEPs ( $n = 5$ ) with (a) 2 wt% CB doped, (b) 6 wt% PVP doped and (c) 2 wt% CB and 4 wt% PVP co-doped. Each data point represents mean  $\pm$  SD.

## Supporting Tables

**Table S1.** Summary of the pressure-sensing results of the STEPs

| Sensor                                 | Sensitivity / mV mmHg <sup>-1</sup> |
|----------------------------------------|-------------------------------------|
| C <sub>0</sub> P <sub>0</sub> -cone    | 1.33 ± 0.04                         |
| C <sub>2</sub> P <sub>0</sub> -cube    | 2.15 ± 0.03                         |
| C <sub>2</sub> P <sub>0</sub> -cone    | 2.49 ± 0.02                         |
| C <sub>4</sub> P <sub>0</sub> -cone    | 1.91 ± 0.05                         |
| C <sub>6</sub> P <sub>0</sub> -cone    | 1.58 ± 0.02                         |
| C <sub>8</sub> P <sub>0</sub> -cone    | 1.43 ± 0.01                         |
| C <sub>0</sub> P <sub>2</sub> -cone    | 1.62 ± 0.05                         |
| C <sub>0</sub> P <sub>4</sub> -cone    | 2.16 ± 0.02                         |
| C <sub>0</sub> P <sub>6</sub> -cone    | 2.36 ± 0.03                         |
| C <sub>0</sub> P <sub>8</sub> -cone    | 1.91 ± 0.01                         |
| C <sub>2</sub> P <sub>2</sub> -cone    | 2.49 ± 0.04                         |
| C <sub>2</sub> P <sub>4</sub> -cone    | 2.61 ± 0.02                         |
| C <sub>2</sub> P <sub>6</sub> -cone    | 2.27 ± 0.02                         |
| C <sub>2</sub> P <sub>8</sub> -cone    | 1.77 ± 0.02                         |
| C <sub>2</sub> P <sub>10</sub> -cone   | 1.56 ± 0.04                         |
| 4 C <sub>2</sub> P <sub>0</sub> -cones | 3.14 ± 0.02                         |



**Table S2.** Comparison of pressure-sensing sensitivity with other reported sensors following a simple fabrication process with not more than 4 layers and covering the clinically relevant pressure range of 0 – 70 mmHg<sup>1-7</sup>

|          | Papers                                                                                                                                    | Layers   | Sensing Range / mmHg | Sensitivity / mV mmHg <sup>-1</sup> |
|----------|-------------------------------------------------------------------------------------------------------------------------------------------|----------|----------------------|-------------------------------------|
| <b>1</b> | <b>This work</b>                                                                                                                          | <b>3</b> | <b>0.0 – 70.0</b>    | <b>2.61</b>                         |
| 2        | <i>ACS Appl. Mater. Interfaces</i> 2022, <b>14</b> , 17, 20122–20131 <sup>8</sup>                                                         | 3        | 37.5 – 562.5         | 0.391                               |
| 3        | <i>Adv. Funct. Mater.</i> 2020, <b>30</b> , 2002868 <sup>9</sup>                                                                          | 2        | 11.3 – 225.0         | 0.306                               |
| 4        | <i>Small Methods</i> , 2022, <b>6</b> , 2101051 <sup>10</sup>                                                                             | 4        | 0.0 – 750.1          | 0.203                               |
| 5        | <i>19th International Conference on Solid-State Sensors, Actuators and Microsystems (TRANSDUCERS)</i> , 2017, pp. 1025-1028 <sup>11</sup> | 3        | 0.0 – 37.5           | 0.134                               |

References:

1. T. Chen, Q. Shi, Z. Yang, J. Liu, H. Liu, L. Sun and C. Lee, *Nanomaterials*, 2018, **8**, 503.
2. X. Fu, H. Dong, Y. Zhen and W. Hu, *Small*, 2015, **11**, 3351-3356.
3. L. Lin, Y. Xie, S. Wang, W. Wu, S. Niu, X. Wen and Z. L. Wang, *ACS Nano*, 2013, **7**, 8266-8274.
4. K. Tao, Z. Chen, J. Yu, H. Zeng, J. Wu, Z. Wu, Q. Jia, P. Li, Y. Fu, H. Chang and W. Yuan, *Advanced Science*, 2022, **9**, 2104168.
5. Z. Wang, T. Bu, Y. Li, D. Wei, B. Tao, Z. Yin, C. Zhang and H. Wu, *ACS Applied Materials & Interfaces*, 2021, **13**, 56320-56328.
6. X. Yaoux, S. Youkang, T. Lan, H. Yougen, Z. Pengli, S. Rong and W. Ching-Ping, *Nano Energy*, 2020, **70**, 104436.
7. F. Zhang, Y. Zang, D. Huang, C.-a. Di and D. Zhu, *Nature Communications*, 2015, **6**, 8356.
8. W. Zhang, Y. Xi, E. Wang, X. Qu, Y. Yang, Y. Fan, B. Shi and Z. Li, *ACS Applied Materials & Interfaces*, 2022, **14**, 20122-20131.
9. J. Li, Y. Long, F. Yang, H. Wei, Z. Zhang, Y. Wang, J. Wang, C. Li, C. Carlos, Y. Dong, Y. Wu, W. Cai and X. Wang, *Advanced Functional Materials*, 2020, **30**, 2002868.
10. Q. Wei, G. Chen, H. Pan, Z. Ye, C. Au, C. Chen, X. Zhao, Y. Zhou, X. Xiao, H. Tai, Y. Jiang, G. Xie, Y. Su and J. Chen, *Small Methods*, 2022, **6**, 2101051.
11. Z. Wu and C. H. Ahn, presented in part at the 2017 19th International Conference on Solid-State Sensors, Actuators and Microsystems (TRANSDUCERS), 2017.

## **Supporting Videos**

**Video S1.** Simulation of von Mises Stress within cuboid and cone sensing structure during triboelectrification at varying pressure.

**Video S2.** Pressure measurement with STEPs at the inner aspect of the elbow during arm flexion at constant pressure.

**Video S3.** Pressure measurement with STEPs between the finger and beaker during grip-based scenario at constant pressure.

**Video S4.** Pressure measurement with STEPs at the finger during bending at increasing pressure.

**Video S5.** Multidirectional pressure measurement with STEPs
